# Supplementary material
Source: MDPI journal article supplement (https://www.mdpi.com/2073-4344/10/10/1216)
Supplement: s1 [file s1]

*Supporting Information*

# A multi-enzyme cascade for the production of high value aromatic compounds

**Claudia Engelmann<sup>1</sup>, Jens Johannsen<sup>2</sup>, Thomas Waluga<sup>2</sup>, Georg Fieg<sup>2</sup>, Andreas Liese<sup>1</sup> and Paul Bubenheim<sup>\*1</sup>**

<sup>1</sup> Institute of Technical Biocatalysis, Hamburg University of Technology, Denickestr. 15, 21073 Hamburg

<sup>2</sup> Institute of Process and Plant Engineering, Hamburg University of Technology, Am Schwarzenberg-Campus 4, 21073 Hamburg

\* Correspondence: paul.bubenheim@tuhh.de

## Enzyme choice

The activity of the different ADHs and the pH and temperature screening were determined *via* initial reaction rate measurements.

| No. | Enzyme  | Activity <sub>Aldehyde</sub> | Activity <sub>Alcohol</sub> |
|-----|---------|------------------------------|-----------------------------|
| 1   | ADH-39L | 0.616 U/mg                   | 0.021 U/mg                  |
| 2   | ADH-80  | /                            | /                           |
| 3   | ADH-99L | /                            | /                           |
| 4   | ADH-125 | /                            | /                           |
| 5   | ADH-168 | 0.624 U/mg                   | 0.082 U/mg                  |
| 6   | ADH-97L | 0.953 U/mg                   | 0.030 U/mg                  |

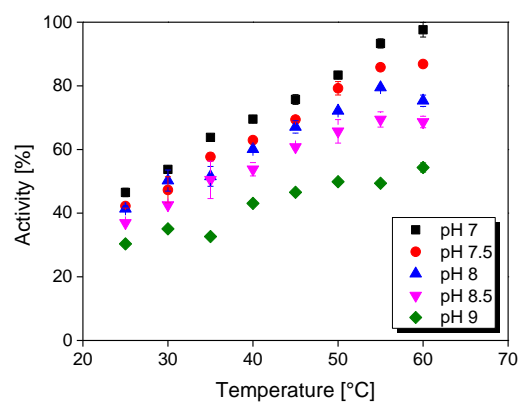

**Cond.:** Left:  $c = 20$  mM (5% DMSO), Tris/HCl buffer (pH 8, 0.1 M),  $c_{\text{NAD}^+} = 0.05$ ,  $\lambda = 340$  nm,  $T = 30$  °C.

Right: Tris/HCl buffer (pH 8, 0.1 M),  $c = 5$  mM,  $c_{\text{NADH}} = 0.05$  mM,  $\lambda = 340$  nm,  $T = 30$  °C.

The different lipases from were screened batchwise in 1 mL in a tempered shaker and the reaction solution was analyzed via gas chromatography.

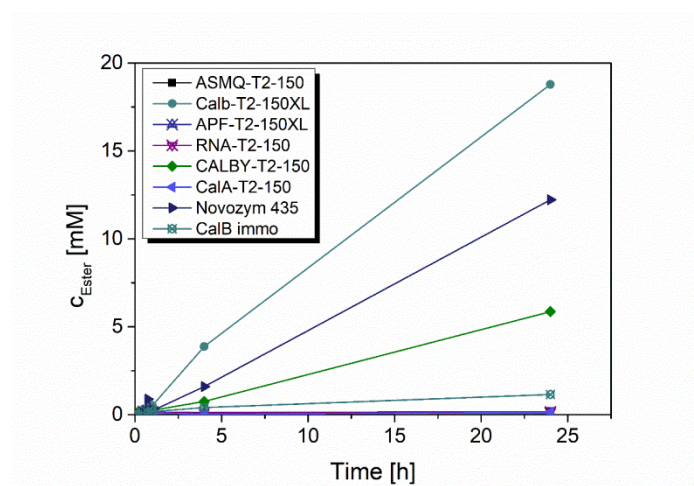

**Cond.:**  $V_{\text{CPME}} = 1$  mL,  $c_{\text{Acid/Alcohol}} = 100$  mM,  $m_{\text{Lipase}} = 5$  mg,  $T = 50$  °C.

## Kinetics

The kinetics were investigated as described in the manuscript.

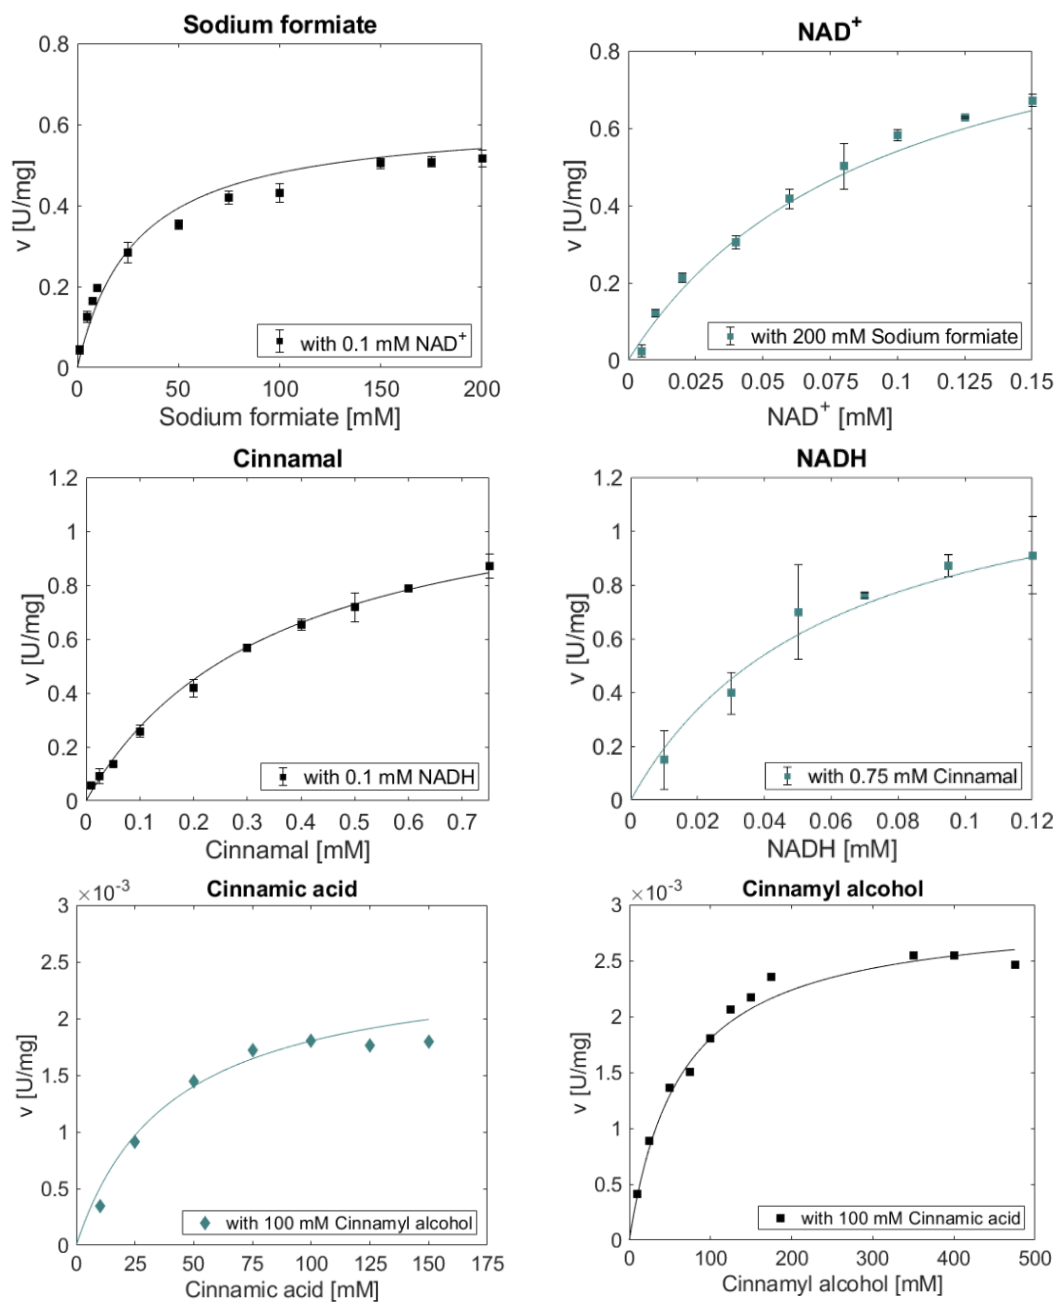

## Differential scanning fluorimetry

Measurement of protein stability by differential scanning fluorimetry as described in the manuscript. The plots show the reaction progress of the in situ co-factor regeneration depending on the ADH concentration.

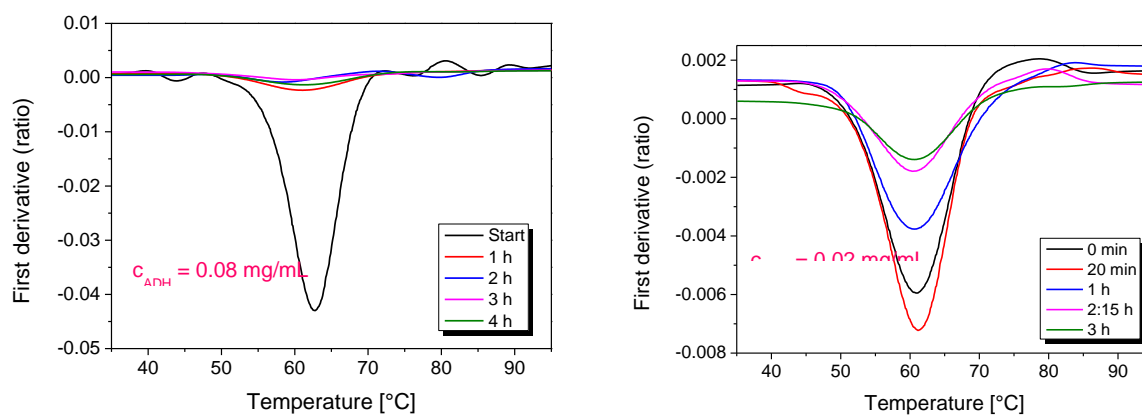

**Cond.:** Potassium phosphate buffer pH 8, 0.1 M,  $V = 25 \text{ mL}$ ,  $c_{\text{Aldehyde}} = 7.5 \text{ mM}$ ,  $c_{\text{NADH}} = 0.15 \text{ mM}$ ,  $m_{\text{ADH}} = 0.08/0.02 \text{ mg}$ ,  $m_{\text{FDH}} = 5 \text{ mg}$ ,  $c_{\text{sodium formate}} = 100 \text{ mM}$ ,  $30 \text{ }^{\circ}\text{C}$ .
